# Supplementary material
Source: PubMed Central journal article supplement (PMC2646752)

**Structure of the 1,*N*<sup>2</sup>-Ethenodeoxyguanosine Adduct Opposite Cytosine in Duplex DNA: Hoogsteen Base Pairing at pH 5.2<sup>†</sup>**

Supporting Information

Ganesh Shanmugam<sup>‡</sup>, Ivan D. Kozekov<sup>‡</sup>, F. Peter Guengerich<sup>||</sup>, Carmelo J. Rizzo<sup>‡,||</sup>, and Michael P. Stone<sup>\*,‡,||</sup>

Departments of Chemistry and Biochemistry, Vanderbilt Institute of Chemical Biology, Center in Molecular Toxicology, and the Vanderbilt-Ingram Cancer Center, Vanderbilt University, Nashville, Tennessee 37235

<sup>‡</sup>Department of Chemistry

<sup>||</sup>Department of Biochemistry

\*Author to whom correspondence should be addressed. (615) 322-2589; (615) 322-7591 (FAX); email: michael.p.stone@vanderbilt.edu

Running Title: The 1,*N*<sup>2</sup>-εdG Adduct in Duplex DNA at pH 5.2

Keywords: Etheno DNA Adducts, DNA Adduct Conformation

<sup>†</sup>This paper is dedicated to the memory of Professor Bea Singer 1922-2005.

|           |                                                                                                                                                                                                                                                                               |
|-----------|-------------------------------------------------------------------------------------------------------------------------------------------------------------------------------------------------------------------------------------------------------------------------------|
| Table S1  | Chemical shifts of non-exchangeable protons for the unmodified duplex at pH 5.2                                                                                                                                                                                               |
| Table S2  | Chemical shifts of non-exchangeable protons for the 1, <i>N</i> <sup>2</sup> -εdG-modified duplex at pH 5.2                                                                                                                                                                   |
| Table S3  | Chemical shifts of exchangeable protons for the 1, <i>N</i> <sup>2</sup> -εdG-modified duplex at pH 5.2                                                                                                                                                                       |
| Table S4  | Chemical shifts of exchangeable protons for the unmodified duplex at pH 5.2                                                                                                                                                                                                   |
| Figure S1 | NOESY data showing cross-peaks between the base protons and deoxyribose H2' and H2'' protons, pH 5.2.                                                                                                                                                                         |
| Figure S2 | NOESY data showing cross-peaks between the deoxyribose H1' to deoxyribose H3' protons in the 5'→3' direction for the unmodified duplex at pH 5.2.                                                                                                                             |
| Figure S3 | NOESY data showing cross peaks between the C <sup>19</sup> hydrogen bonded amino proton and flanking T <sup>5</sup> imino proton (peak a), and between C <sup>19</sup> non-hydrogen bonded amino proton and flanking T <sup>5</sup> imino proton (peak b).                    |
| Figure S4 | Chemical shift differences observed for 1, <i>N</i> <sup>2</sup> -εdG-modified duplex as compared to the corresponding unmodified duplex at pH 5.2. $\Delta\delta = [\delta_{\text{unmodified oligodeoxynucleotide}} - \delta_{\text{modified oligodeoxynucleotide}}]$ (ppm). |

**Table S1.** Non-exchangeable Proton Chemical Shifts<sup>a</sup> of the Unmodified Duplex<sup>b</sup> at 7 °C.

| Nucleotide      | H8   | H6   | H1'  | H2'  | H2'' | H3'  | H5/H2/CH <sub>3</sub> |
|-----------------|------|------|------|------|------|------|-----------------------|
| C <sup>1</sup>  |      | 7.66 | 5.72 | 1.97 | 2.40 | 4.69 | 5.88                  |
| G <sup>2</sup>  | 7.97 |      | 5.90 | 2.66 | 2.74 | 4.97 |                       |
| C <sup>3</sup>  |      | 7.40 | 5.59 | 2.11 | 2.42 | 4.85 | 5.43                  |
| A <sup>4</sup>  | 8.33 |      | 6.21 | 2.64 | 2.89 | 5.00 | 7.61                  |
| T <sup>5</sup>  |      | 7.03 | 5.58 | 1.76 | 2.15 | 4.77 | 1.39                  |
| G <sup>6</sup>  | 7.74 |      | 5.38 | 2.56 | 2.60 | 4.91 |                       |
| G <sup>7</sup>  | 7.71 |      | 5.47 | 2.54 | 2.68 | 4.97 |                       |
| A <sup>8</sup>  | 8.07 |      | 5.95 | 2.66 | 2.89 | 5.02 | 7.18                  |
| A <sup>9</sup>  | 8.09 |      | 6.12 | 2.50 | 2.89 | 4.95 | 7.65                  |
| T <sup>10</sup> |      | 7.10 | 5.88 | 2.00 | 2.46 | 4.83 | 1.23                  |
| C <sup>11</sup> |      | 7.55 | 6.02 | 2.17 | 2.46 | 4.81 | 5.59                  |
| C <sup>12</sup> |      | 7.64 | 6.21 | 2.25 | 2.25 | 4.53 | 5.71                  |
| G <sup>13</sup> | 7.81 |      | 5.60 | 2.48 | 2.66 | 4.79 |                       |
| G <sup>14</sup> | 7.85 |      | 5.62 | 2.68 | 2.77 | 5.00 |                       |
| A <sup>15</sup> | 8.25 |      | 6.29 | 2.70 | 2.97 | 5.02 | 7.83                  |
| T <sup>16</sup> |      | 7.20 | 5.96 | 2.01 | 2.58 | 4.83 | 1.31                  |
| T <sup>17</sup> |      | 7.39 | 6.10 | 2.11 | 2.58 | 4.87 | 1.52                  |
| C <sup>18</sup> |      | 7.51 | 5.92 | 2.09 | 2.44 | 4.83 | 5.55                  |
| C <sup>19</sup> |      | 7.49 | 5.26 | 2.11 | 2.36 | 4.83 | 5.57                  |
| A <sup>20</sup> | 8.35 |      | 6.23 | 2.70 | 2.93 | 5.00 | 7.64                  |
| T <sup>21</sup> |      | 7.11 | 5.66 | 1.95 | 2.33 | 4.81 | 1.44                  |
| G <sup>22</sup> | 7.85 |      | 5.78 | 2.60 | 2.62 | 4.79 |                       |

---

|                 |      |      |      |      |      |      |
|-----------------|------|------|------|------|------|------|
| C <sup>23</sup> | 7.33 | 5.73 | 1.98 | 2.33 | 4.79 | 5.38 |
| G <sup>24</sup> | 7.92 | 6.11 | 2.32 | 2.32 | 4.65 |      |

---

<sup>a</sup> Values in parts per million. <sup>b</sup> 10 mM NaH<sub>2</sub>PO<sub>4</sub>, 100 mM NaCl, and 5 μM Na<sub>2</sub>EDTA (pH 5.2).

**Table S2.** Non-exchangeable Proton Chemical Shifts<sup>a</sup> of the 1,*N*<sup>2</sup>- $\epsilon$ dG-modified Duplex<sup>b</sup> at 7 °C.

| Nucleotide      | H8/H2 <sup>c</sup> | H6   | H1'  | H2'  | H2'' | H3'  | H5/H2/CH <sub>3</sub> |
|-----------------|--------------------|------|------|------|------|------|-----------------------|
| C <sup>1</sup>  |                    | 7.65 | 5.73 | 1.97 | 2.40 | 4.69 | 5.88                  |
| G <sup>2</sup>  | 7.97               |      | 5.89 | 2.66 | 2.74 | 4.97 |                       |
| C <sup>3</sup>  |                    | 7.39 | 5.57 | 2.07 | 2.40 | 4.83 | 5.41                  |
| A <sup>4</sup>  | 8.27               |      | 6.12 | 2.54 | 2.70 | 4.95 | 7.57                  |
| T <sup>5</sup>  |                    | 6.55 | 5.63 | d    | 2.42 | 4.71 | 1.29                  |
| X <sup>6</sup>  | 7.13               |      | 5.71 | 2.04 | d    | 4.97 |                       |
| G <sup>7</sup>  | 7.80               |      | d    | 2.64 | 2.64 | 5.12 |                       |
| A <sup>8</sup>  | 8.05               |      | 5.94 | 2.64 | 2.85 | 5.02 | 7.17                  |
| A <sup>9</sup>  | 8.10               |      | 6.14 | 2.52 | 2.87 | 4.97 | 7.65                  |
| T <sup>10</sup> |                    | 7.11 | 5.86 | 2.00 | 2.46 | 4.81 | 1.25                  |
| C <sup>11</sup> |                    | 7.56 | 6.02 | 2.17 | 2.44 | 4.81 | 5.59                  |
| C <sup>12</sup> |                    | 7.66 | 6.20 | 2.25 | 2.25 | 4.53 | 5.73                  |
| G <sup>13</sup> | 7.80               |      | 5.59 | 2.48 | 2.64 | 4.79 |                       |
| G <sup>14</sup> | 7.84               |      | 5.59 | 2.68 | 2.77 | 5.00 |                       |
| A <sup>15</sup> | 8.24               |      | 6.27 | 2.70 | 2.95 | 5.02 | 7.83                  |
| T <sup>16</sup> |                    | 7.20 | 5.94 | 2.01 | 2.56 | 4.83 | 1.29                  |
| T <sup>17</sup> |                    | 7.40 | 6.08 | 2.17 | 2.56 | 4.87 | 1.50                  |
| C <sup>18</sup> |                    | 7.65 | 6.00 | 2.25 | 2.46 | 4.85 | 5.67                  |
| C <sup>19</sup> |                    | 7.56 | 5.59 | 1.52 | 2.33 | 4.81 | 5.81                  |
| A <sup>20</sup> | 8.54               |      | 6.22 | 2.79 | 2.93 | 5.00 | 7.78                  |
| T <sup>21</sup> |                    | 7.14 | 5.69 | 1.95 | 2.34 | 4.81 | 1.43                  |
| G <sup>22</sup> | 7.85               |      | 5.79 | 2.60 | 2.62 | 4.79 |                       |

---

|                 |      |      |      |      |      |      |
|-----------------|------|------|------|------|------|------|
| C <sup>23</sup> | 7.33 | 5.71 | 1.89 | 2.33 | 4.79 | 5.38 |
| G <sup>24</sup> | 7.92 | 6.12 | 2.31 | 2.31 | 4.65 |      |

---

<sup>a</sup> Values in parts per million. <sup>b</sup> 10 mM NaH<sub>2</sub>PO<sub>4</sub>, 100 mM NaCl, and 5 μM Na<sub>2</sub>EDTA (pH 5.2). <sup>c</sup> Imidazole proton of X<sup>6</sup>. Etheno protons H7 and H6 observed at 7.33 ppm. <sup>d</sup> not detected

**Table S3.** Exchangeable Proton Chemical Shifts<sup>a</sup> of the 1,*N*<sup>2</sup>-εdG-modified duplex<sup>b</sup> at 7 °C (pH 5.2).

| Base Pair                        | C( <i>N</i> <sup>4</sup> H) <sub>nhb</sub> | C( <i>N</i> <sup>4</sup> H) <sub>hb</sub> | G( <i>N</i> 1H) | T( <i>N</i> 3H) |
|----------------------------------|--------------------------------------------|-------------------------------------------|-----------------|-----------------|
| C <sup>1</sup> •G <sup>24</sup>  | 7.16                                       | 8.14                                      |                 |                 |
| G <sup>2</sup> •C <sup>23</sup>  | 6.61                                       | 8.41                                      | 13.03           |                 |
| C <sup>3</sup> •G <sup>22</sup>  | 6.51                                       | 8.31                                      | 12.61           |                 |
| A <sup>4</sup> •T <sup>21</sup>  |                                            |                                           |                 | 13.54           |
| T <sup>5</sup> •A <sup>20</sup>  |                                            |                                           |                 | 13.34           |
| X <sup>6</sup> •C <sup>19</sup>  | 8.95                                       | 10.22                                     |                 |                 |
| G <sup>7</sup> •C <sup>18</sup>  | 7.19                                       | 8.14                                      | 12.34           |                 |
| A <sup>8</sup> •T <sup>17</sup>  |                                            |                                           |                 | 13.61           |
| A <sup>9</sup> •T <sup>16</sup>  |                                            |                                           |                 | 13.73           |
| T <sup>10</sup> •A <sup>15</sup> |                                            |                                           |                 | 13.56           |
| C <sup>11</sup> •G <sup>14</sup> | 6.85                                       | 8.36                                      | 12.76           |                 |
| C <sup>12</sup> •G <sup>13</sup> | 7.24                                       | 8.31                                      |                 |                 |

<sup>a</sup> Values in parts per million. <sup>b</sup> 10 mM NaH<sub>2</sub>PO<sub>4</sub>, 100 mM NaCl, and 5 μM Na<sub>2</sub>EDTA (pH 5.2). nh and nhb refer to the hydrogen-bonded and non-hydrogen bonded cytidine amino protons, respectively.

**Table S4.** Exchangeable Proton Chemical Shifts<sup>a</sup> of the Unmodified Duplex<sup>b</sup> at 7 °C (pH 5.2).

| Base Pair                        | C(N <sup>4</sup> H) <sub>nbb</sub> | C(N <sup>4</sup> H) <sub>hb</sub> | G(N1H) | T(N3H) |
|----------------------------------|------------------------------------|-----------------------------------|--------|--------|
| C <sup>1</sup> •G <sup>24</sup>  | 7.14                               | 8.15                              |        |        |
| G <sup>2</sup> •C <sup>23</sup>  | 6.63                               | 8.39                              | 13.04  |        |
| C <sup>3</sup> •G <sup>22</sup>  | 6.51                               | 8.35                              | 12.65  |        |
| A <sup>4</sup> •T <sup>21</sup>  |                                    |                                   |        | 13.53  |
| T <sup>5</sup> •A <sup>20</sup>  |                                    |                                   |        | 13.61  |
| G <sup>6</sup> •C <sup>19</sup>  | 6.82                               | 8.47                              | 12.69  |        |
| G <sup>7</sup> •C <sup>18</sup>  | 6.67                               | 8.23                              | 12.51  |        |
| A <sup>8</sup> •T <sup>17</sup>  |                                    |                                   |        | 13.80  |
| A <sup>9</sup> •T <sup>16</sup>  |                                    |                                   |        | 13.76  |
| T <sup>10</sup> •A <sup>15</sup> |                                    |                                   |        | 13.61  |
| C <sup>11</sup> •G <sup>14</sup> | 6.86                               | 8.39                              | 12.79  |        |
| C <sup>12</sup> •G <sup>13</sup> | 7.21                               | 8.33                              |        |        |

<sup>a</sup> Values in parts per million. <sup>b</sup> 10 mM NaH<sub>2</sub>PO<sub>4</sub>, 100 mM NaCl, and 5 μM Na<sub>2</sub>EDTA (pH 5.2). nh and nbb refer to the hydrogen-bonded and non-hydrogen bonded cytidine amino protons, respectively.



**Figure S1.**  $^1\text{H}$  NOESY spectrum showing cross peaks establishing connectivity between the base protons and the deoxyribose H2' and H2'' protons. Labeled peaks A, T<sup>5</sup> H6→A<sup>4</sup> H2' (weak); B, T<sup>5</sup> H6→A<sup>4</sup> H2'' (weak); C, T<sup>5</sup> H6→T<sup>5</sup> H2''; D, X<sup>6</sup> H2→X<sup>6</sup> H2' (weak, overlapped); E, X<sup>6</sup> H2→T<sup>5</sup> H2'' (weak, overlapped); F, G<sup>7</sup> H8→X<sup>6</sup> H2' (medium); G, G<sup>7</sup> H8→X<sup>6</sup> H2''(medium); H, C<sup>18</sup> H6→C<sup>18</sup> H2' (overlapped); I, C<sup>18</sup> H6→C<sup>18</sup> H2'' (overlapped); J, C<sup>19</sup> H6→C<sup>18</sup> H2' (very weak); K, C<sup>19</sup> H6→C<sup>18</sup> H2'' (overlapped); L, C<sup>19</sup> H6→C<sup>19</sup> H2'; M, C<sup>19</sup> H6→C<sup>19</sup> H2'' (medium); N, A<sup>20</sup> H8→C<sup>19</sup> H2'; O, A<sup>20</sup> H8→C<sup>19</sup> H2''. The spectrum was recorded at 7 °C at 250 ms mixing time (pH 5.2).

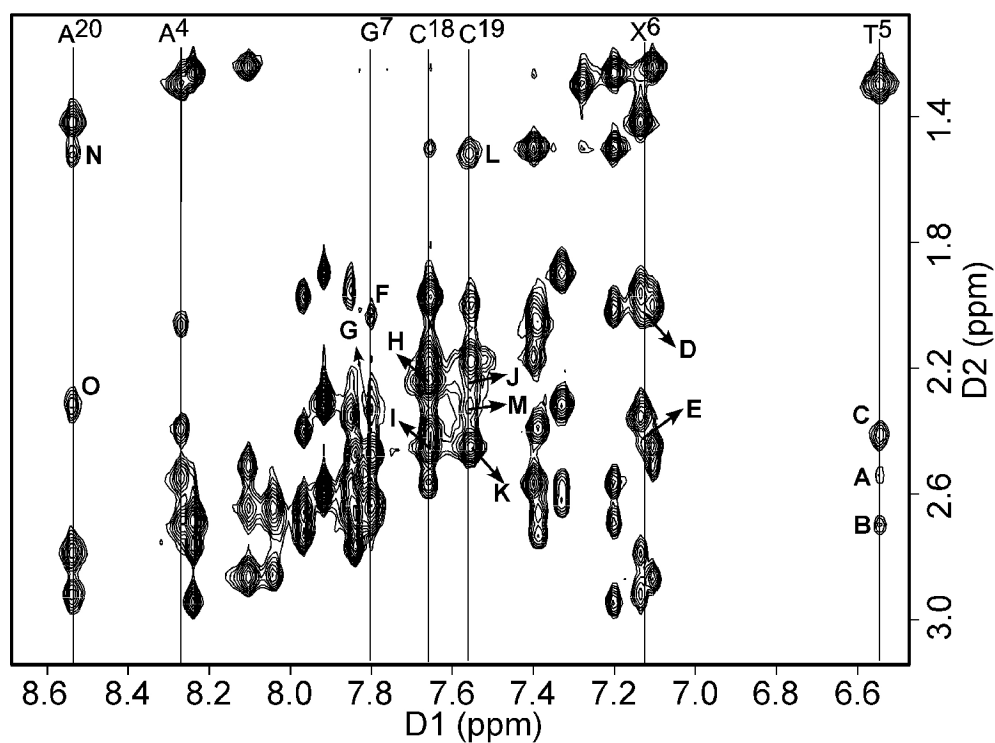

**Figure S2.**  $^1\text{H}$  NOESY spectrum showing sequential NOE connectivity from anomeric H1' to 3'-neighbor aromatic protons for the unmodified oligodeoxynucleotide duplex. The spectra were recorded at 7 °C, at 250 ms mixing time (pH 5.2). **A.** Nucleotides  $\text{C}^1 \rightarrow \text{C}^{12}$ . **B.** Nucleotides  $\text{G}^{13} \rightarrow \text{G}^{24}$ . Asterisks indicate cytosine H5-H6 cross peaks.

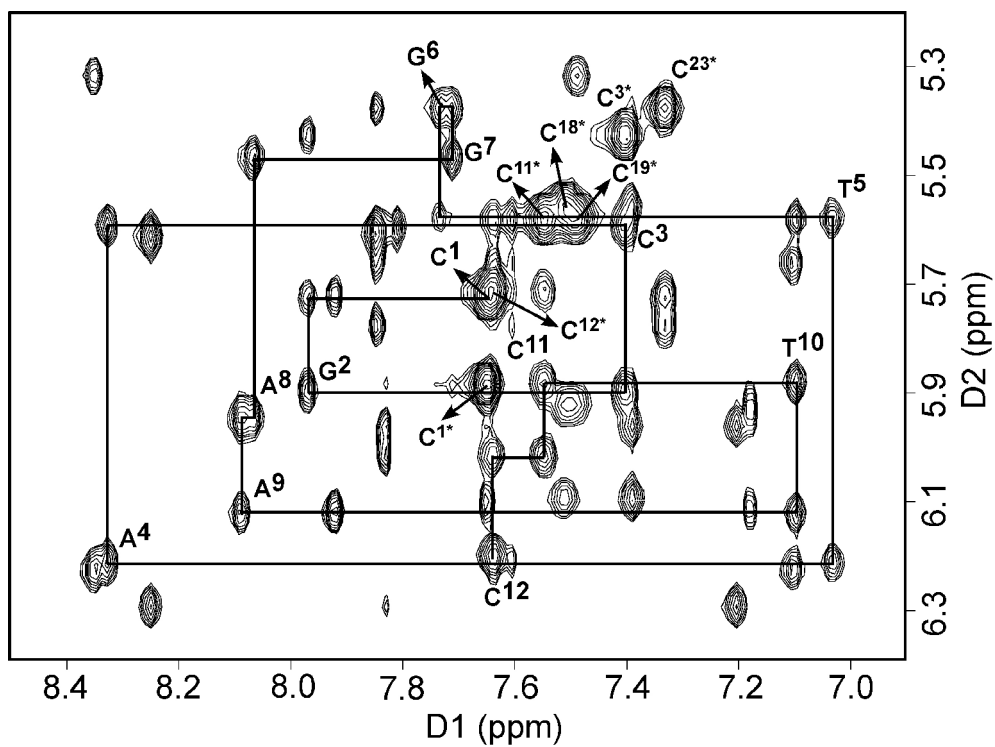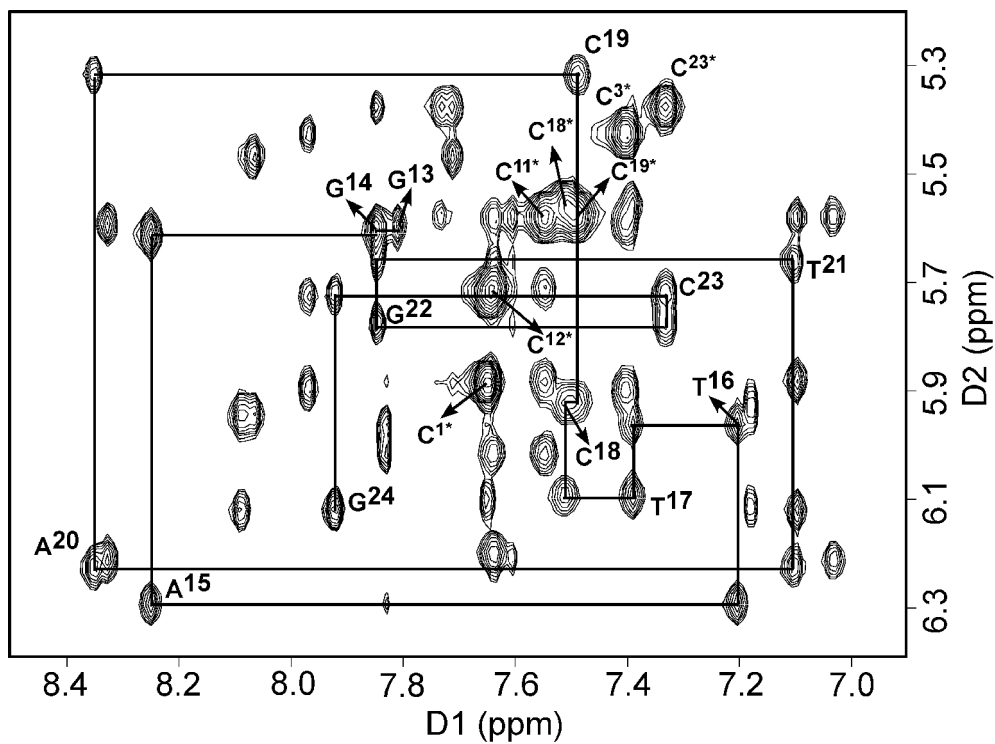

**Figure S3.** NOESY data (processed with lower threshold value than in Figure 3) showing cross peaks between the C<sup>19</sup> hydrogen bonded amino proton and flanking T<sup>5</sup> imino proton (peak a), and between C<sup>19</sup> non-hydrogen bonded amino proton and flanking T<sup>5</sup> imino proton (peak b). The NOESY spectrum was recorded in 10 mM phosphate buffer (9:1 H<sub>2</sub>O:D<sub>2</sub>O) at 7 °C (pH 5.2). Mixing time was 250 ms.

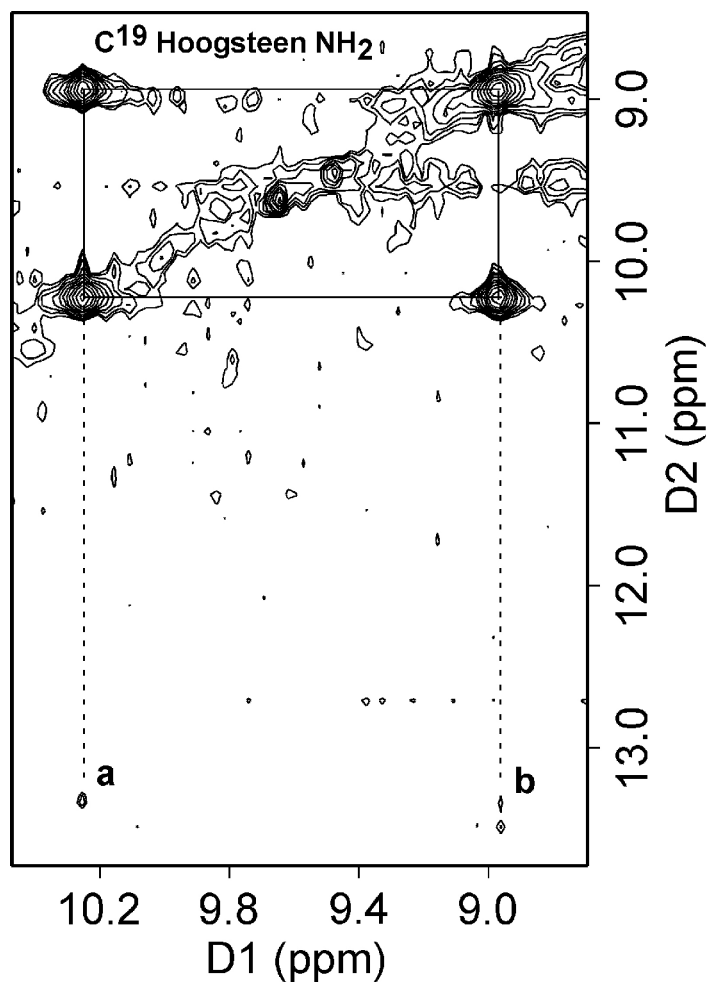

Figure S4 Chemical shift differences observed for 1,*N*<sup>2</sup>-εdG-modified duplex as compared to the corresponding unmodified duplex at pH 5.2.  $\Delta\delta = [\delta_{\text{unmodified oligodeoxynucleotide}} - \delta_{\text{modified oligodeoxynucleotide}}]$  (ppm).

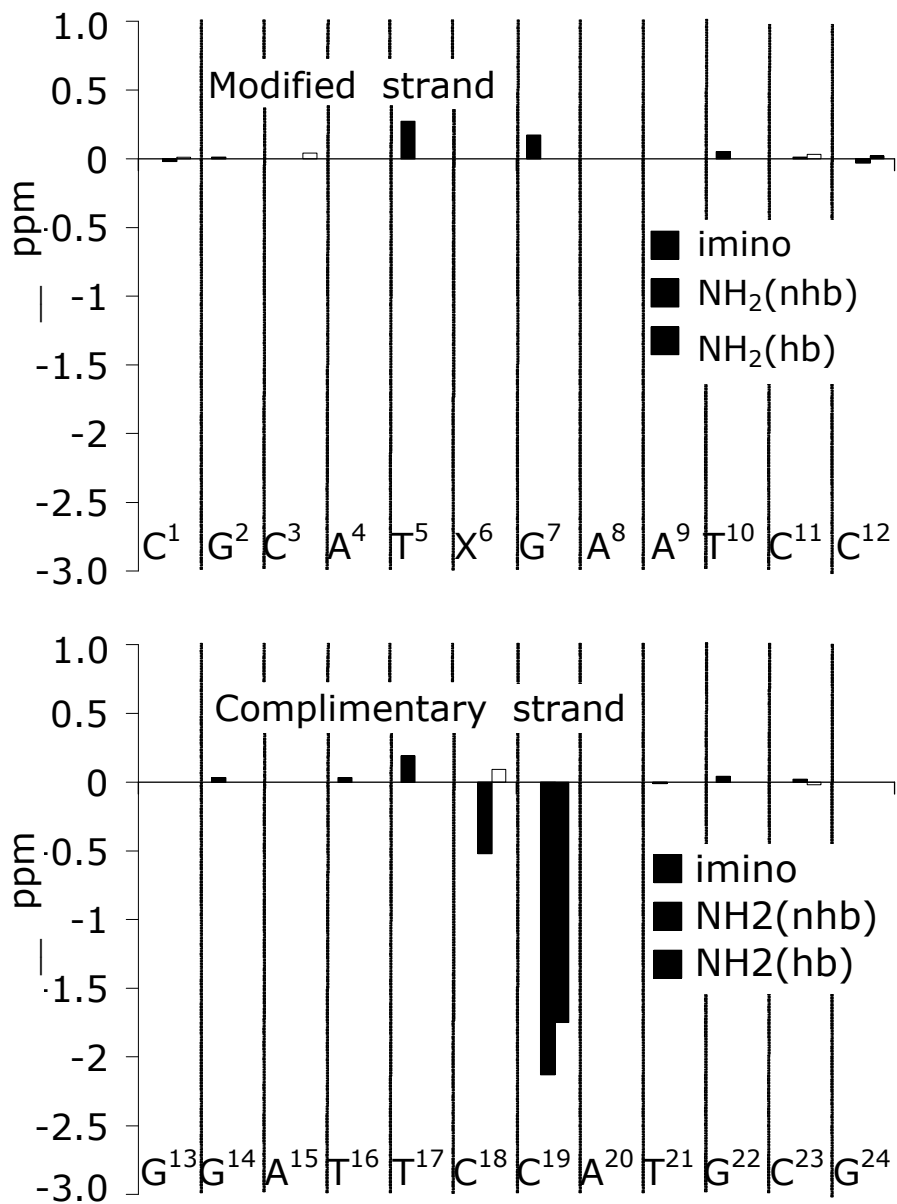

Supplement: tx8001466-File002.pdf [file tx8001466-File002.pdf]
